# Supplementary material
Source: Research Square preprint supplement (doi:10.21203/rs.3.rs-8774633/v1)
Supplement: Supplementary file 1 [file 5ae5e9eb32f5d9de9bcbd75f.docx]

**Table 1. Baseline Sociodemographic and Obstetric Characteristics of the Groups (N=82)**

| **Variables** | **Standing**  **(n=41)** | **Squatting**  **(n=41)** | **p** |
| --- | --- | --- | --- |
| **Age (years), Mean ± SD** | 26.78 ± 4.97 | 29.34 ± 4.89 | 0.352 |
| **Educational level, n (%)** |  |  | 0.455 |
| Primary school or less | 17 (41.5) | 16 (39.0) |  |
| Secondary school | 9 (22.0) | 9 (22.0) |  |
| High school or higher | 15 (36.5) | 16 (39.0) |  |
| **Marital status (married), n (%)** | 35 (85.4) | 40 (97.6) | 0.109 |
| **Family type (nuclear), n (%)** | 33 (80.5) | 38 (92.7) | 0.248 |
| **Income status (income ≥ expenses), n (%)** | 29 (70.7) | 29 (70.7) | 0.496 |
| **Chronic disease (no), n (%)** | 41 (100.0) | 37 (90.2) | 0.116 |
| **Gravida, Mean ± SD** | 3.02 ± 1.25 | 3.49 ± 1.34 | 0.122 |
| **Number of vaginal births, Mean ± SD** | 1.66 ± 0.82 | 2.05 ± 1.09 | 0.206 |
| **Gestational week, Mean ± SD** | 39.90 ± 1.04 | 39.63 ± 1.07 | 0.216 |
| **Oxytocin use, n (%)** | 19 (46.3) | 24 (58.5) | 0.269 |
| **Cervical dilatation at admission (cm), Mean ± SD** | 4.66 ± 1.88 | 4.30 ± 1.56 | 1.000 |
| **Cervical effacement (%), Mean ± SD** | 57.50 ± 11.75 | 51.74 ± 14.14 | 0.067 |
| **Total birth duration (min), Mean ± SD** | 246.56 ± 250.60 | 242.80 ± 215.80 | 0.377 |

**Note:** Independent samples *t*-test was used for continuous variables and chi-square test for categorical variables. No statistically significant differences were observed between groups (p>0.05).

**Table 2. Comparison of Childbirth Comfort and Perceived Birth Trauma Between Groups (N=82)**

| **Outcomes** | **Standing (n=41)**  **Mean±SD** | **Squatting (n=41)**  **Mean±SD** | **p** |
| --- | --- | --- | --- |
| **Traumatic Birth Perception Scale–Total** | 31.10 ± 32.31 | 35.46 ± 31.53 | 0.538 |
| Levels of perceived birth trauma, n (%) |  |  | 0.745 |
| Very low–Low | 34 (82.9) | 31 (75.6) |  |
| Moderate | 2 (4.9) | 4 (9.8) |  |
| High–Very high | 5 (12.2) | 6 (14.6) |  |
| **Childbirth Comfort Scale–Total** | 39.49 ± 5.89 | 37.32 ± 8.15 | 0.171 |
| Physical comfort | 17.61 ± 3.38 | 16.76 ± 4.48 | 0.333 |
| Environmental comfort | 14.20 ± 1.31 | 13.46 ± 1.98 | 0.052 |
| Psychospiritual comfort | 7.68 ± 2.55 | 7.10 ± 2.51 | 0.298 |

**Note:** Independent samples t-test was used for continuous variables and chi-square test for categorical variables.
